# Supplementary material for: Toddlers Favor Communicatively Presented Information over Statistical Reliability in Learning about Artifacts
Source: PLoS One. 2015 Mar 17;10(3):e0122129. doi: 10.1371/journal.pone.0122129 (PMC4364367; doi:10.1371/journal.pone.0122129)
Supplement: S2 Dataset — (XLSX) [file pone.0122129.s002.xlsx]

## Sheet: Sheet1
CONTROL GROUP RESULTS
subject	condition	answer	efficient?
1	red f / red e	blue	no
2	red f / red e	red	yes
3	red f / red e	red	yes
4	red f / red e	red	yes
5	red f / red e	red	yes
6	red f / red e	red	yes
7	red f / red e	blue	no
8	red f / red e	blue	no
9	red f / red e	red	yes
10	blue f / red e	red	yes
11	blue f / red e	red	yes
12	blue f / red e	red	yes
13	blue f / red e	blue	no
14	blue f / red e	blue	no
15	blue f / red e	red	yes
16	blue f / red e	red	yes
17	blue f / red e	red	yes
18	red f / blue e	blue	yes
19	red f / blue e	blue	yes
20	red f / blue e	blue	yes
21	red f / blue e	red	no
22	red f / blue e	blue	yes
23	red f / blue e	red	no
24	red f / blue e	blue	yes
25	blue f / blue e	red	no
26	blue f / blue e	red	no
27	blue f / blue e	red	no
28	blue f / blue e	blue	yes
29	blue f / blue e	red	no
30	blue f / blue e	blue	yes
31	red f / red e	red	yes
32	blue f / blue e	blue	yes
33	blue f / red e	red	yes
34	red f / blue e	blue	yes
35	red f / blue e	blue	yes
36	red f / blue e	red	no
37	blue f / blue e	red	no
38	blue f / blue e	blue	yes
39	blue f / blue e	red	no
40	blue f / red e	blue	no
